# Supplementary material for: Tracking Chromosome Evolution in Southern African Gerbils Using Flow-Sorted Chromosome Paints
Source: PubMed Central journal article supplement (PMC3721133; doi:10.1159/000350696), 2013-05-04
Supplement: cgr-0139-0267-s01.pdf [file cgr-0139-0267-s01.pdf]

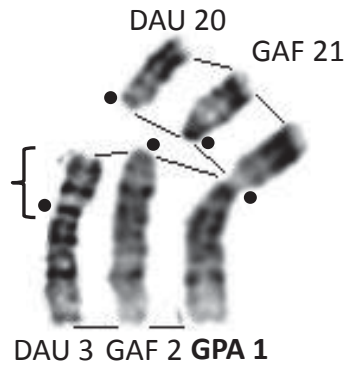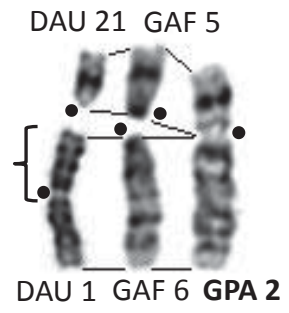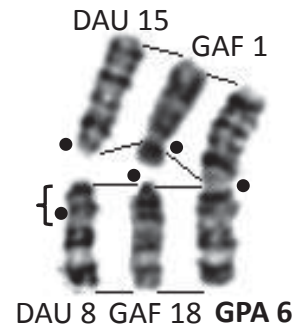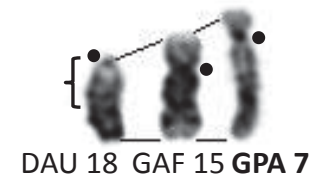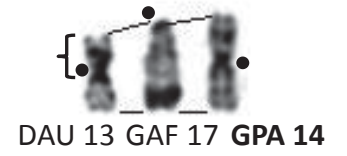

**Suppl. Fig. 1.** Partial autosomal G-band comparison directed by Zoo-FISH among *D. auricularis*, *G. afra* and *G. paeba*. Painting probes GPA1, 2, 6, 7 and 14 indicate that in addition to Robertsonian fusions, a total of 5 inversions were involved during speciation of these rodents. Brackets show the extent of these inversions while dots indicate the position of the centromeres.
